# Supplementary material for: Metabolic heterogeneity of tissue-resident macrophages in homeostasis and during helminth infection
Source: PubMed Central journal article supplement (PMC10497597; doi:10.1038/s41467-023-41353-z), 2023-09-12
Supplement: 41467_2023_41353_MOESM1_ESM.pdf [file 41467_2023_41353_MOESM1_ESM.pdf]

**Supplementary for:**

**Metabolic heterogeneity of tissue macrophages in steady-state and helminth infection**

Graham A Heieis<sup>1\*</sup>, Thiago A Patente<sup>1</sup>, Luís Almeida<sup>1</sup>, Frank Vrieling<sup>2</sup>, Tamar Tak<sup>1</sup>, Georgia Perona-Wright<sup>3</sup>, Rick M. Maizels<sup>3</sup>, Rinke Stienstra<sup>2</sup>, Bart Everts<sup>1\*</sup>

*<sup>1</sup>Department of Parasitology, Leiden University Medical Center, Albinusdreef 2, 2333 ZA Leiden, The Netherlands*

*<sup>2</sup>Nutrition, Metabolism and Genomics Group, Division of Human Nutrition and Health, Wageningen University, 6708WE Wageningen, The Netherlands*

*<sup>3</sup>School of Infection and Immunity, University of Glasgow, 120 University Place , G12 8TA Glasgow, United Kingdom*

*\*Correspondence: [g.a.heieis@lumc.nl](mailto:g.a.heieis@lumc.nl), [b.everts@lumc.nl](mailto:b.everts@lumc.nl)*

**Supplementary figures: 1-8**

**Supplementary tables: 1-12**

**Supplementary methods**

**Supplementary Figures:**

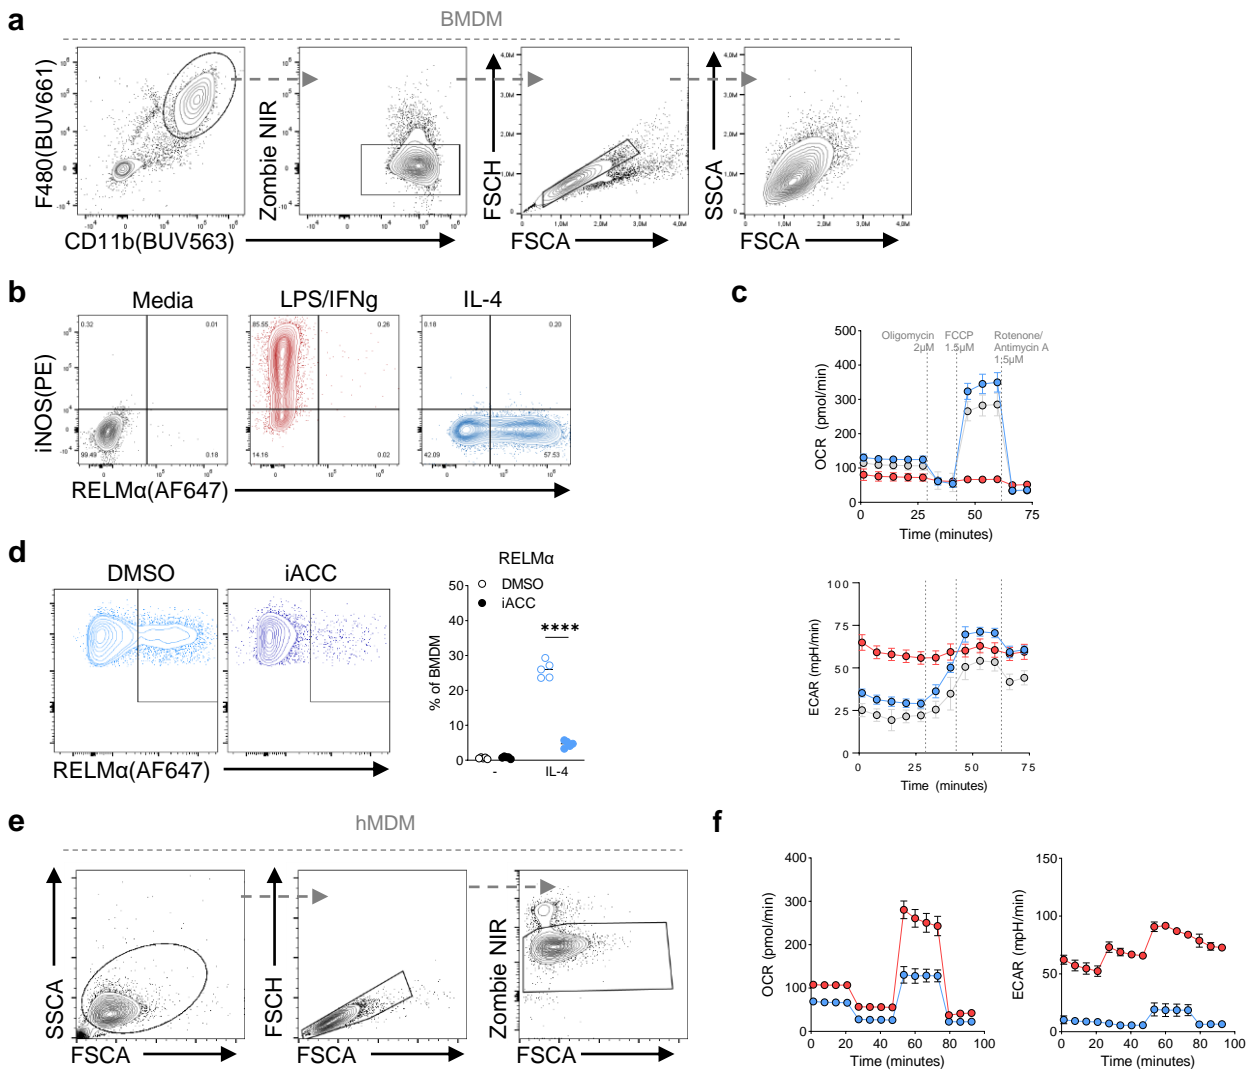

**Supplementary Figure 1**

(a) Representative gating for BMDM after days of culture. (b) Polarization of BMDM in response to overnight stimulation with LPS/IFN $\gamma$  or IL-4. (c) Example traces for Seahorse mitochondrial stress test for BMDM, representative of three experiments. (d) RELM $\alpha$  expression in control or IL-4 stimulated BMDM cultured with DMSO or ACC inhibitor; data points represent biological replicates from individual mice (n=5), representative of 2 independent experiments. (e) Representative scatter-plots for hMDM after 6 days of culture. (f) Example Seahorse traces for hMDM, representative of four experiments with 2-3 donors per experiments. Statistics determined by two-tailed unpaired t-test. \*\*\*\*p<0.0001, \*\*\*p<0.001, \*\*p<0.01, \*p<0.05. Source data are provided as a Source Data file.

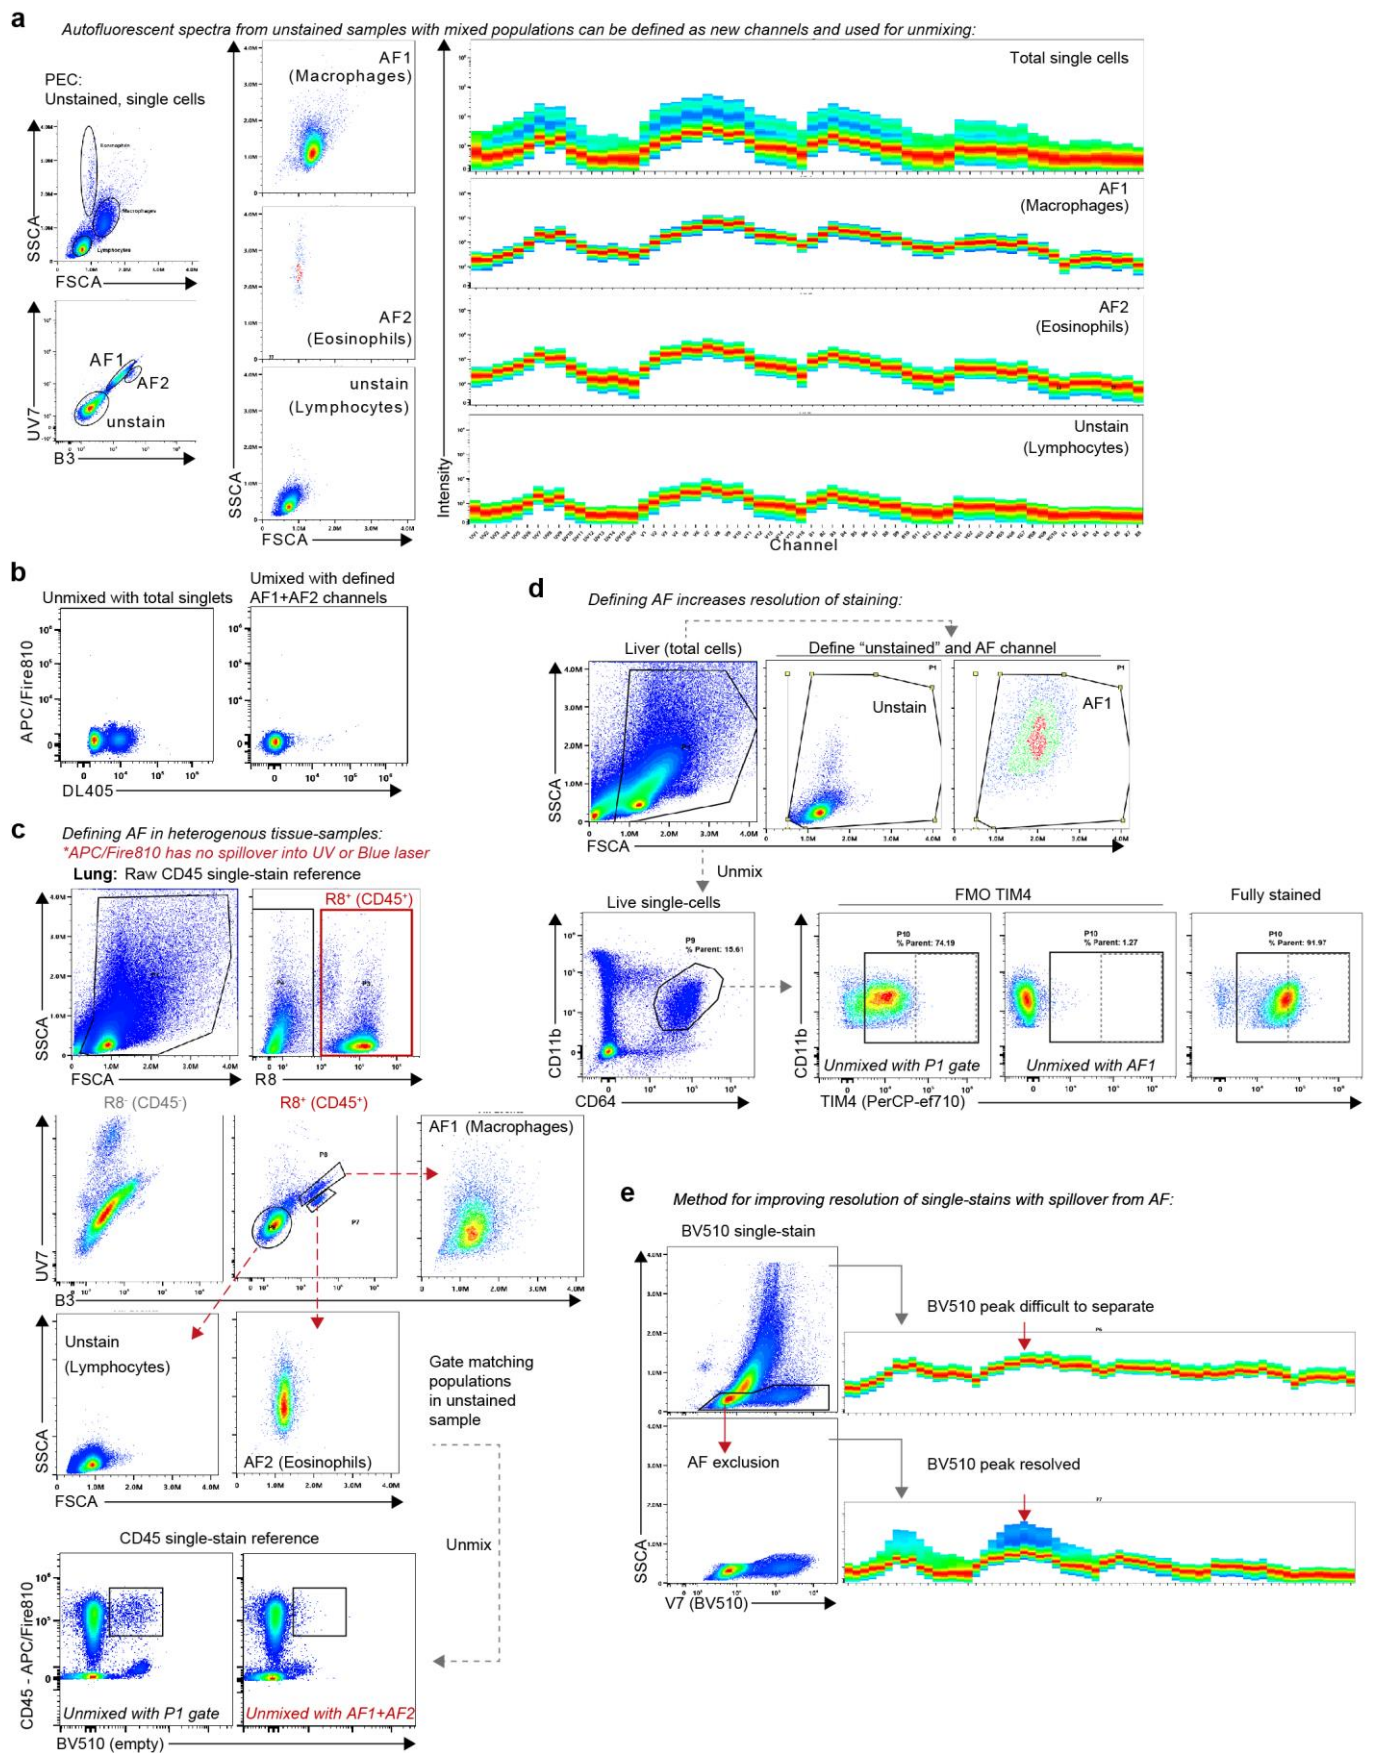

**Supplementary Figure 2**

(a) Distinct scatter profiles and spectral signatures of mphs, lymphocytes and eosinophils in the murine peritoneal cavity. (b) Representative unmixing of unstained sample for a channel with high similarity to AF (DL405), and a channel with low similarity to AF (APC-Fire810) unmixing with or without AF channels defined in (a). (c) Identification of immune cell AF signatures in stromal tissues using raw worksheet, with the lung as an example, and representative unmixing of unstained samples for BV510 (high AF overlap) with and without AF definition. (d) Representative unmixing results for TIM4-PerCP-eFluor710 staining on liver mphs with and without defining extra AF channel. (e) Example of increasing resolution of single-stained samples by gating out AF before unmixing.

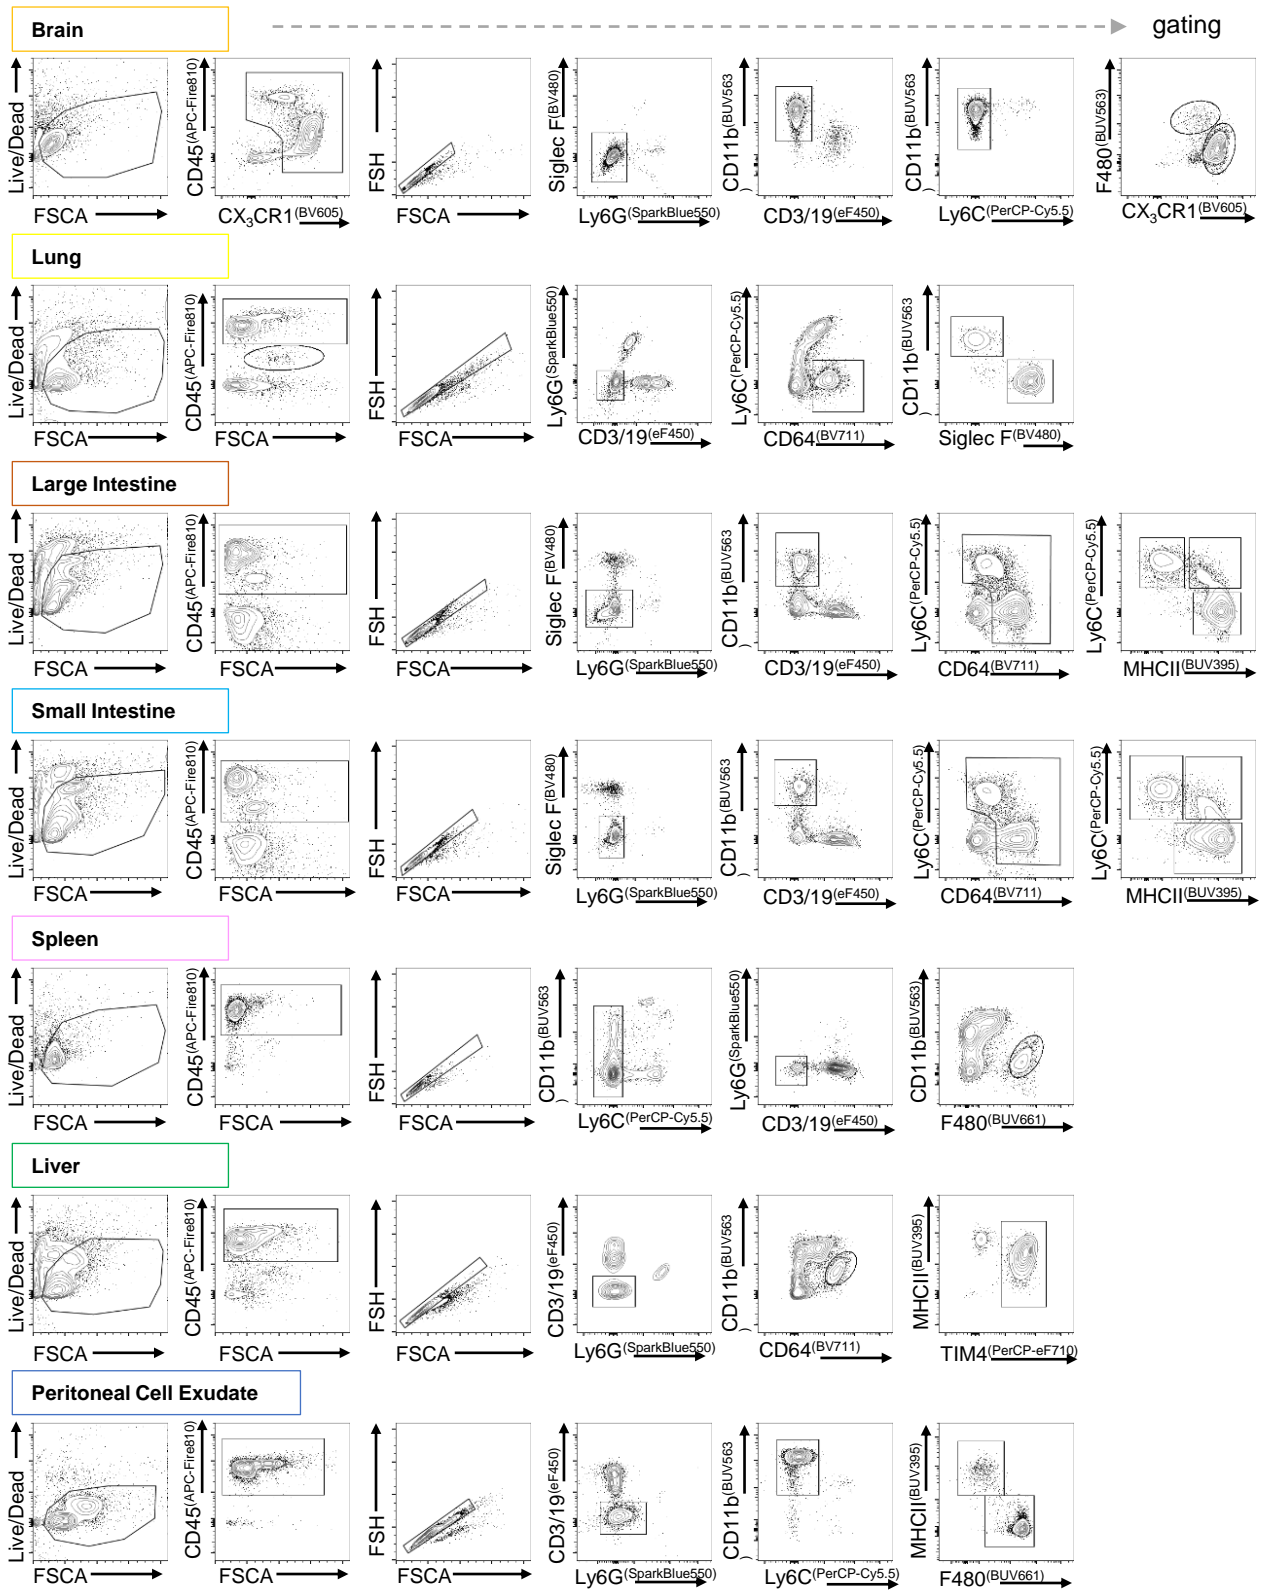

**Supplementary Figure 3**

Gating strategies for identifying tissue macrophage populations from the whole brain, lung, large and small intestines, spleen, liver and peritoneal cavity.

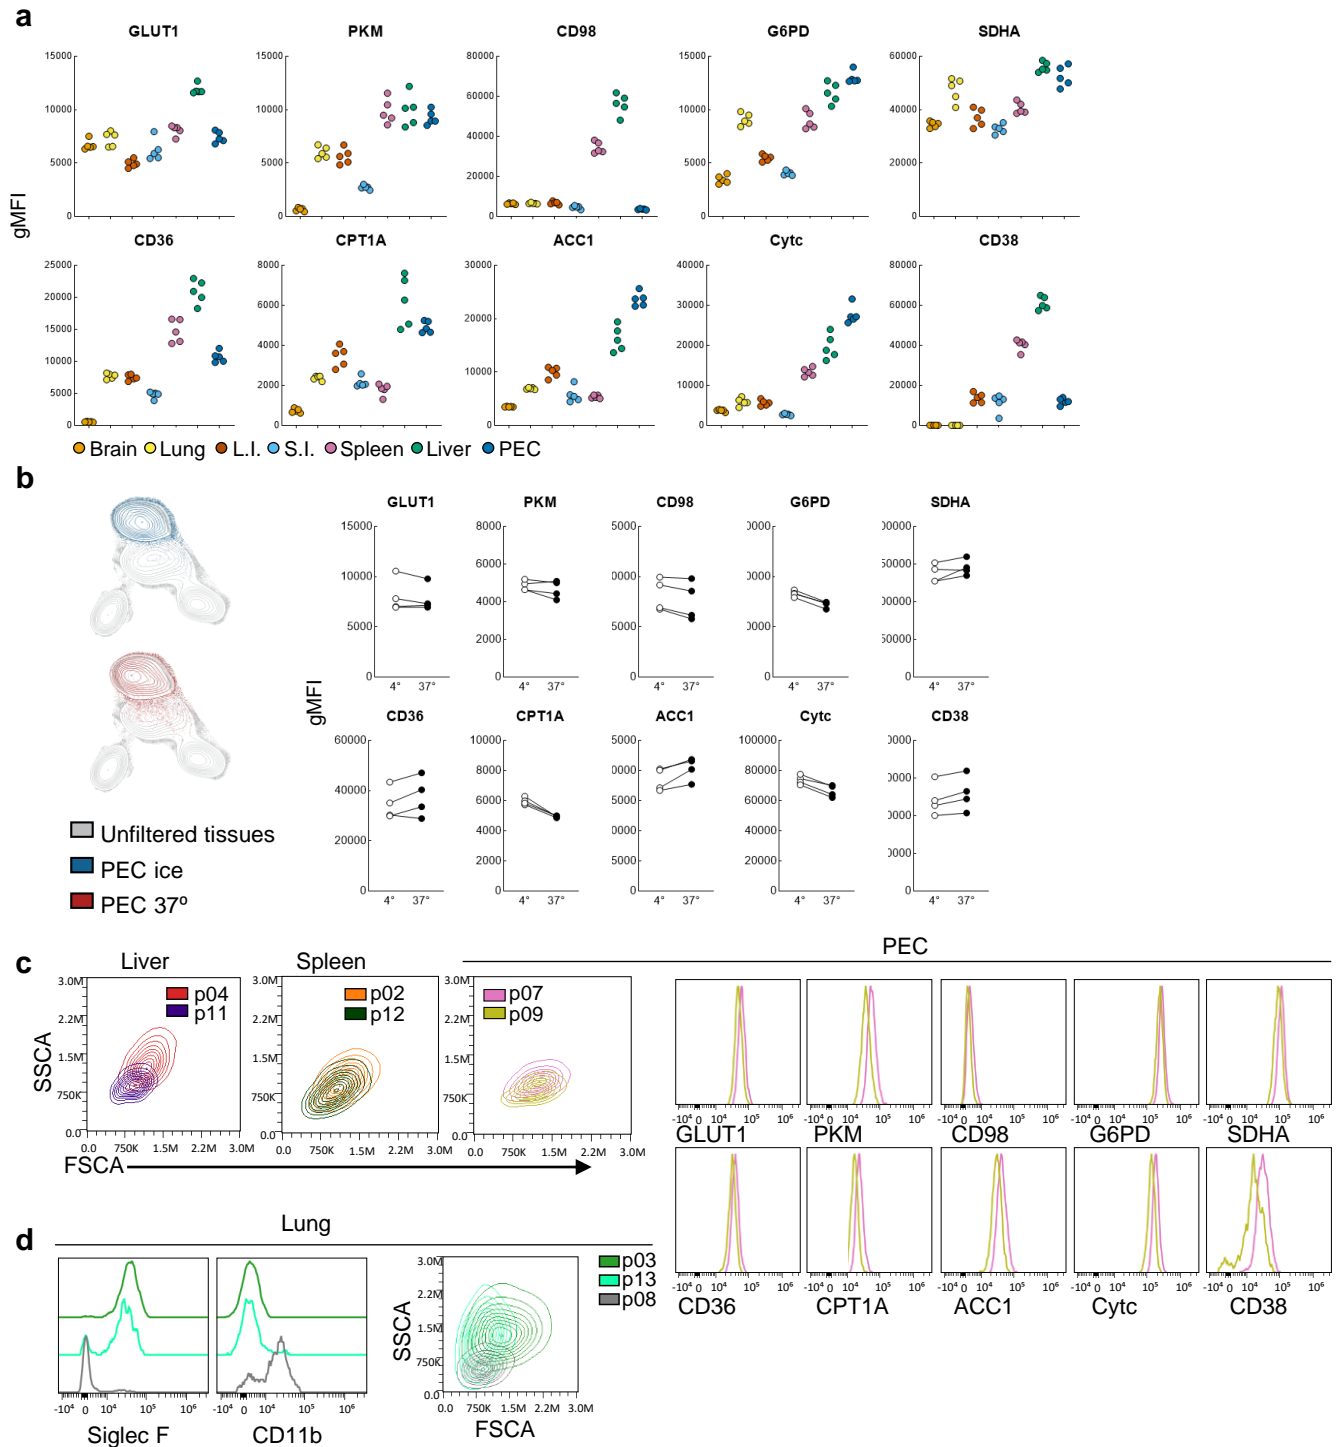

### Supplementary Figure 4

(a) Comparison of raw gMFIs for metabolic markers across tissue macrophages from 1 of 4 independent experiments. (b) PEC samples divided with half stored on ice and the remaining “digested” in RPMI shaking at 37°C for 30min in parallel to digesting tissues, then assessed for metabolic expression and overlap following UMAP using metabolic targets; data points are individual mice (n=4), representative of 2 experiments. (c) Overlay of scatter profiles for prominent clusters in the liver, spleen and PEC and corresponding histograms for metabolic targets in PEC clusters. (d) Histograms identifying interstitial and alveolar macrophage clusters and contour plots showing matching scatter profiles. Source data are provided as a Source Data file.

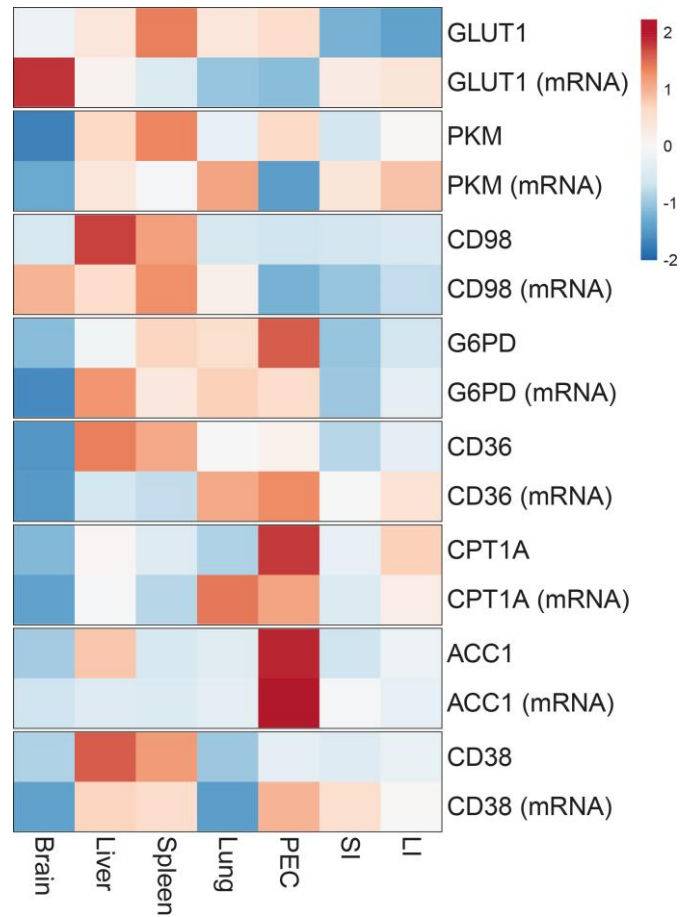

### Supplementary Figure 5

Heatmap showing relative expression for gMFI, according to the mean, of metabolic targets detected by spectral flow cytometry, compared to mean expression (log base 2) from bulk RNA-seq data generated by Lavin *et al*<sup>24</sup>, generated using ClustVis<sup>57</sup>.

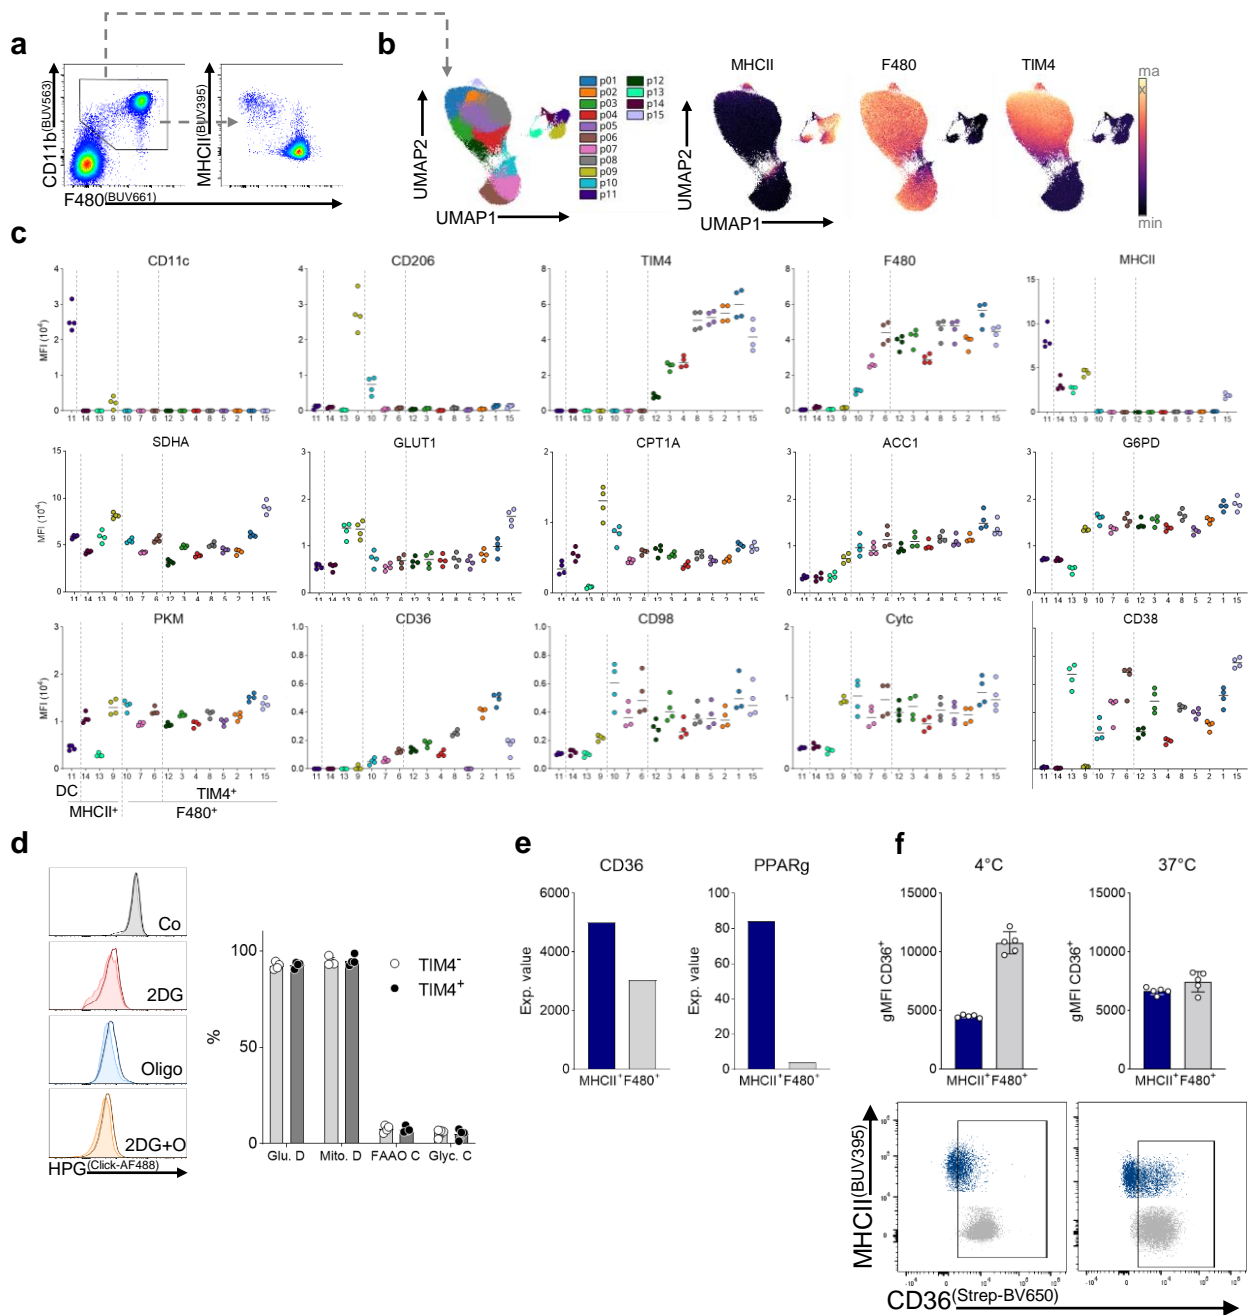

**Supplementary Figure 6**

(a) Gating for UMAP and phenograph analysis of PEC macrophages, as shown in (b) generated using immune (CD11b, F480, MHCII, CD11c, TIM4, CD206, CX<sub>3</sub>CR1, Ly6C, CD301) and metabolic markers. (c) Expression of immune and metabolic markers for identified peritoneal macrophage clusters; corresponding data to Figure 3c. (d) Overlaid histograms and graphed data comparing HPG uptake of TIM4<sup>-</sup> and TIM4<sup>+</sup> peritoneal macrophages, corresponding data to Figure 3d. (e) Normalized gene expression of CD36 and PPAR $\gamma$  in MHCII<sup>Hi</sup> and F480<sup>Hi</sup> macrophages, taken from ImmGen Gene Skyline data browser. (f) Comparison of CD36 expression between MHCII<sup>Hi</sup> and F480<sup>Hi</sup> macrophages, gated on CD36<sup>+</sup> cells, when stained after 20 minutes of incubation at 37°C or kept on ice, data points are individual mice (n=5, mean $\pm$ SD). Source data are provided as a Source Data file.

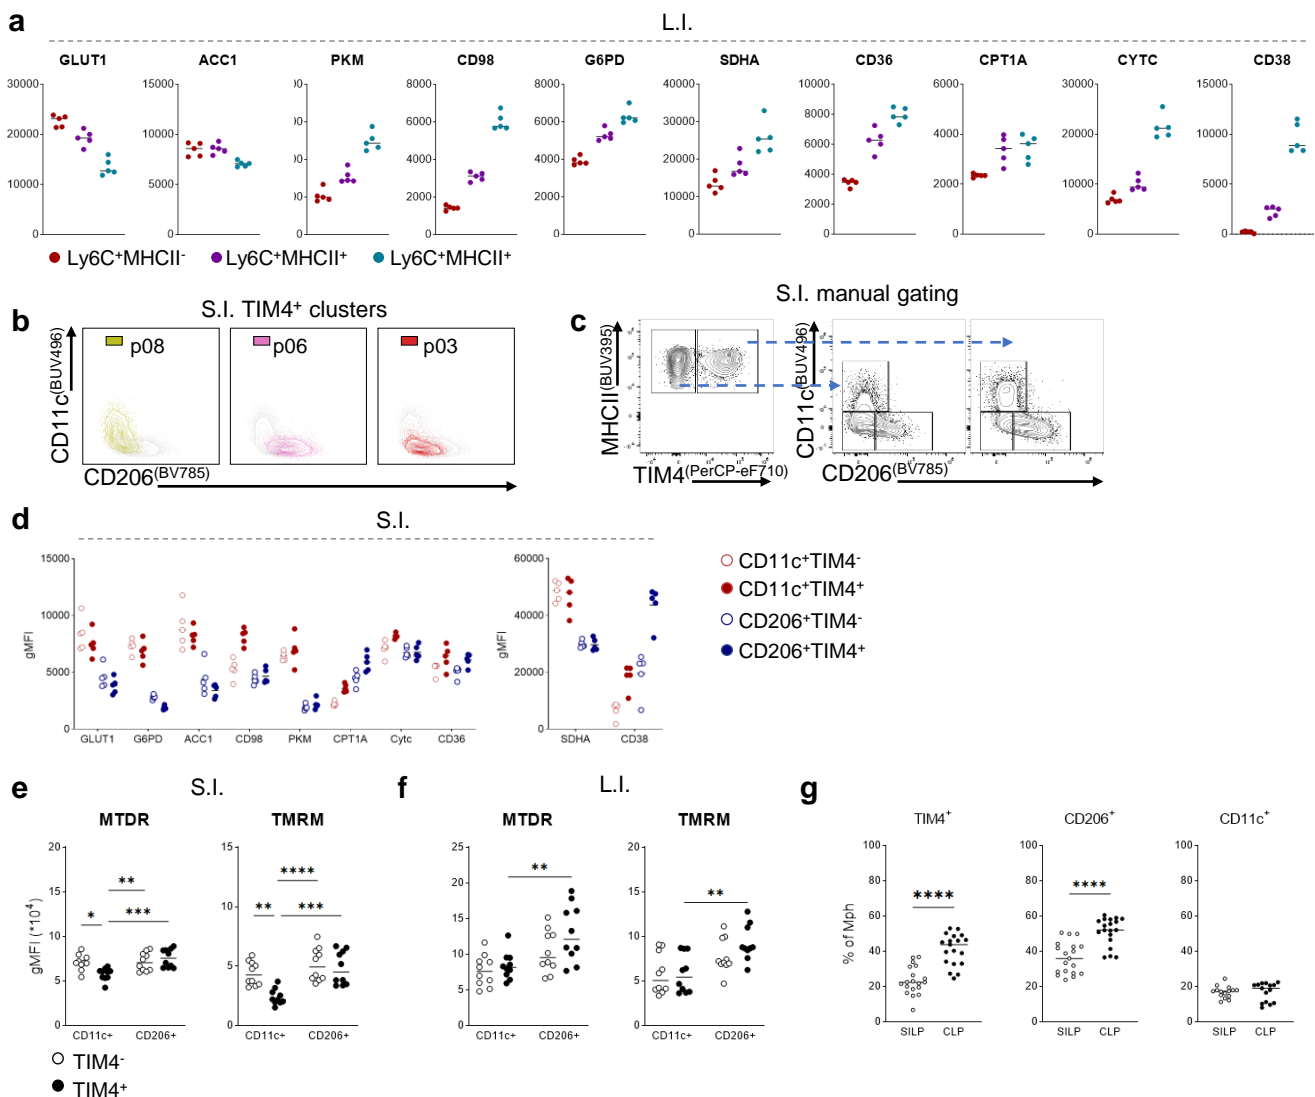

### Supplementary Fig. 7

(a) Metabolic target expression in colonic monocytes, intermediate monocytes/macrophages, and mature macrophages, representative of 4 experiments with  $n=5$  mice. (b) Contour plots of CD11c and CD206 expression of TIM4 phenograph clusters identified from the small intestine. (c) Manual gating of CD11c<sup>+</sup> or CD206<sup>+</sup> cells within TIM4<sup>+</sup> small intestinal macrophages. (d) Comparison of metabolic protein expression (gMFI) between CD11c<sup>+</sup> and CD206<sup>+</sup> cells within TIM4<sup>-</sup> and TIM4<sup>+</sup> macrophages, representative of 4 experiments with  $n=5$  mice. (e) MitoTracker DeepRed and TMRM staining of macrophages from the small and (f) large intestine, according to TIM4, CD11c or CD206 expression as gated in (c), pooled from 2 independent experiments ( $n=5$  mice per experiment). (g) Frequency of TIM4<sup>+</sup>, CD206<sup>+</sup> and CD11c<sup>+</sup> macrophages in the small and large intestine pooled from 3 independent experiments ( $n=4-5$  mice per experiment). Statistics calculated using two-way ANOVA with Tukey test for multiple comparisons (e,f) or two-tailed unpaired t-test (g). \*\*\*\* $p<0.0001$ , \*\*\* $p<0.001$ , \*\* $p<0.01$ , \* $p<0.05$ . Source data are provided as a Source Data file.



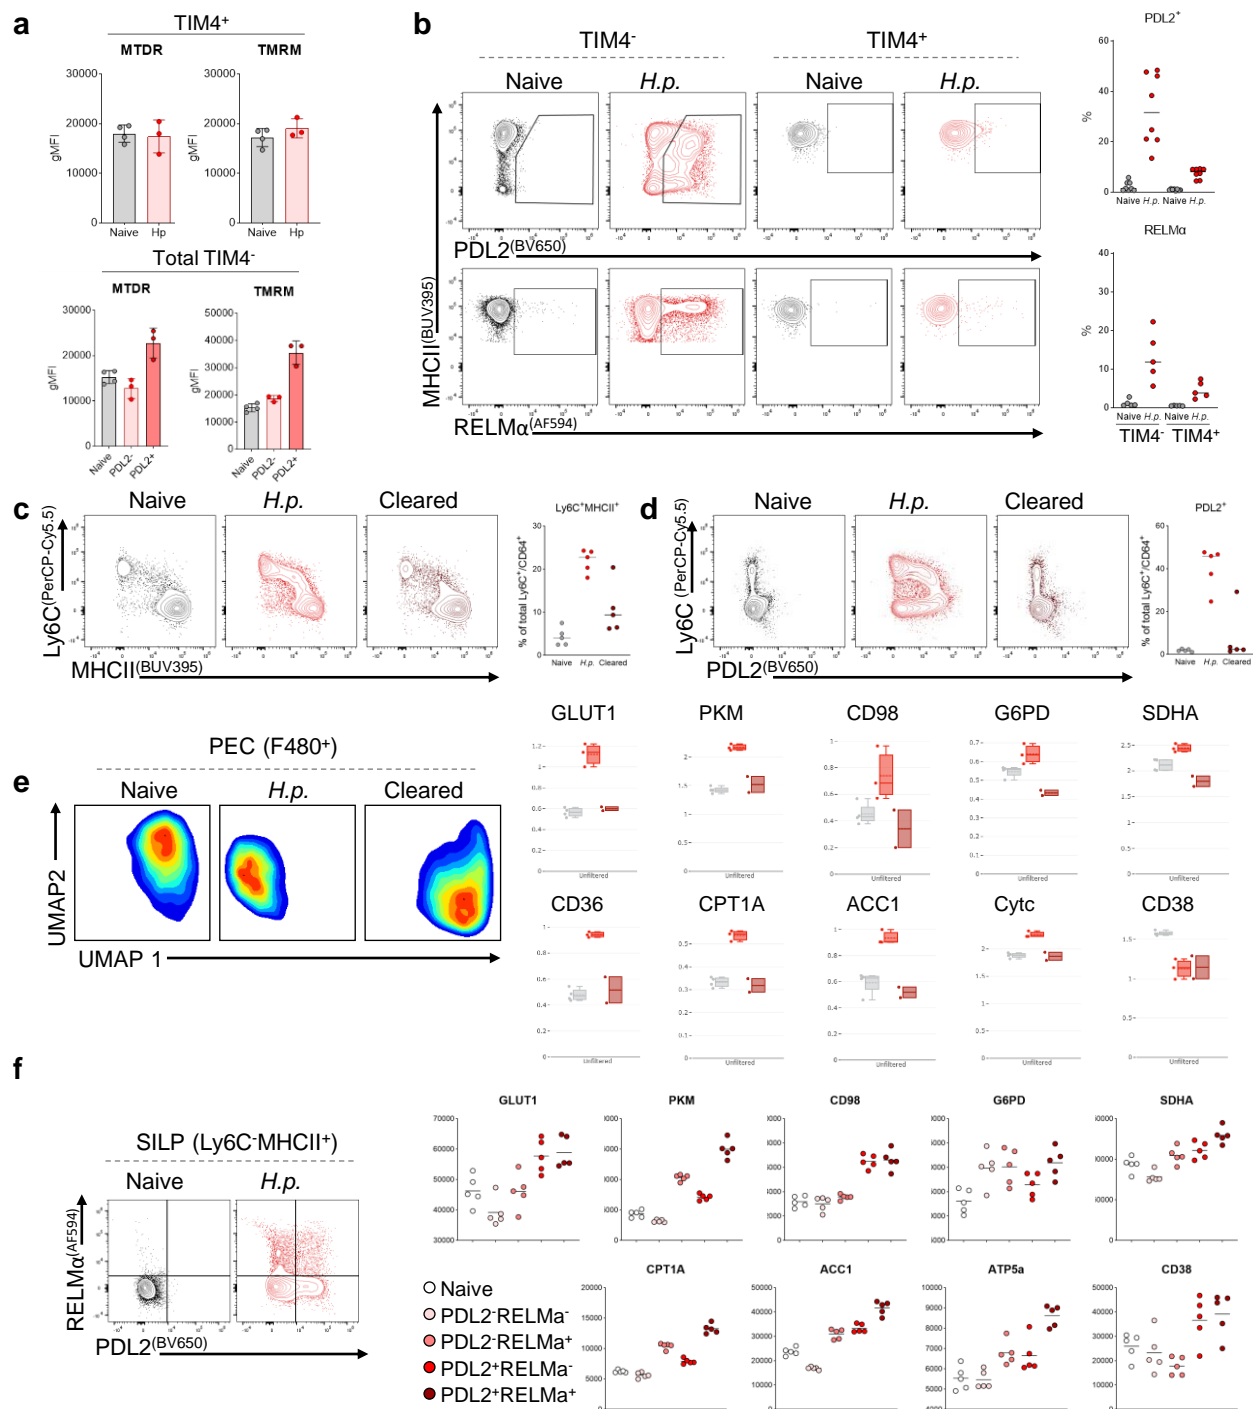

**Supplementary Figure 8**

(a) Quantified MitoTracker DeepRed and TMRM staining on small intestine macrophages from naive ( $n=4$ ) or Hp infected ( $n=3$ ) mice, one experiment represented (mean $\pm$ SD). (b) Representative staining and frequencies for alternative activation markers in TIM4<sup>-</sup> monocytes/macrophages and TIM4<sup>+</sup> macrophages from the small intestine following *H. polygyrus* infection, representative of, or pooled from, 2 experiments with 3-5 mice per group. (c) Flow plots displaying monocyte waterfall in naive, infected and cleared mice, and corresponding frequencies of monocytes, intermediate and mature macrophages. (d) Corresponding flow plots for Ly6C and PDL2 expression and frequency of total PDL2<sup>+</sup> cells, individual mice shown ( $n=5$  per group), representative of 2 experiments. (e) UMAP and relative metabolic expression in peritoneal macrophages before, during or after infection, individual mice shown and representative of 2 experiments ( $n=2-5$ /group, 25-75<sup>th</sup> percentile with median, min and max shown). (f) Gating used to identify PDL2<sup>+</sup>/RELMA<sup>+</sup> macrophages, used for Fig. 6h, and gMFI for metabolic targets in each quadrant, individual mice shown ( $n=5$  per group), representative of 2 experiments. Source data are provided as a Source Data file.

## Supplementary Tables

**Supplementary Table 1: Flow cytometry reagents and staining order**

| Target                            | Fluor           | Company        | Cat. #     | Dilution |
|-----------------------------------|-----------------|----------------|------------|----------|
| <b><i>Live/dead stain</i></b>     |                 |                |            |          |
| Fixable viability kit             | Zombie NIR      | BioLegend      | 423106     | 1000x    |
| <b><i>Surface pre-fix</i></b>     |                 |                |            |          |
| CD11c                             | BUV496          | BD Bioscience  | 750450     | 400x     |
| CD206                             | BV785           | BioLegend      | 141729     | 400x     |
| CX <sub>3</sub> CR1               | BV605           | BioLegend      | 149027     | 100x     |
| CD36                              | AF700           | BioLegend      | 56-0362-80 | 100x     |
|                                   | Biotin          | BioLegend      | 102604     | 100x     |
| CD19 <i>or</i>                    | ef450           | ThermoFisher   | 48-0193-82 | 100x     |
| B220                              | BV510           | BioLegend      | 103248     | 100x     |
| <b><i>Surface post-fix</i></b>    |                 |                |            |          |
| CD45                              | APC/Fire810     | BioLegend      | 103173     | 2000x    |
| CD11b                             | BUV563          | BD Biosciences | 741242     | 10000x   |
| F4/80                             | BUV661          | BD Biosciences | 750643     | *200x    |
| CD64                              | BV711           | BioLegend      | 139311     | 100x     |
| TIM4                              | PerCP-ef710     | ThermoFisher   | 46-5866-82 | **10000x |
| MHCII                             | BUV395          | BD Biosciences | 743876     | 3000x    |
| PDL1                              | BUV737          | BD Biosciences | 741877     | 100x     |
| PDL2                              | BV650           | BD Biosciences | 740624     | 100x     |
| Ly6G                              | SB550           | BioLegend      | 108467     | 1000x    |
| Siglec F                          | BV480           | BD Biosciences | 746668     | 400x     |
| Ly6C                              | PerCP-Cy5.5     | BioLegend      | 128012     | 1000x    |
| CD3                               | BV750           | BioLegend      | 100249     | 200x     |
|                                   | eF450           | ThermoFisher   | 48-0032-82 | 100x     |
| CD98                              | BUV615          | BD Biosciences | 752360     | 400x     |
| CD38                              | BUV805          | BD Biosciences | 741955     | 400x     |
| Streptavidin                      | BV570 <i>or</i> | BioLegend      | 405227     | 400x     |
|                                   | BV650           | BioLegend      | 405232     | 400x     |
| <b><i>Intracellular stain</i></b> |                 |                |            |          |
| iNOS                              | PE              | BioLegend      | 696806     | 10000x   |
| RELM-alpha primary                | -               | PeptoTech      | 500-P214   | 0.5µg/ml |
| Goat αRb secondary                | AF594           | ThermoFisher   |            | 1000x    |
|                                   | AF647           | ThermoFisher   |            |          |

**Metabolic Targets**

|                                                                |                                   |       |                                  |               |
|----------------------------------------------------------------|-----------------------------------|-------|----------------------------------|---------------|
| Glut1<br>( <i>Lightning link</i> )                             | BSA/Azide free<br>DL405           | Abcam | ab252403<br>ab201798             | 1000x         |
| PKM<br>( <i>Lightning link</i> )                               | BSA/Azide free<br>PE              | Abcam | ab206129<br>ab102918             | 400x          |
| SDHA<br>( <i>Lightning link</i> )                              | BSA/Azide free<br>AF647           | Abcam | ab240098<br>ab269823             | 2000x         |
| CPT1A<br>( <i>Lightning link</i> )                             | BSA/Azide free<br>PE/Cy5          | Abcam | ab235841<br>ab102893             | 200x          |
| ACC1<br>( <i>Lightning link</i> )<br>( <i>Lightning link</i> ) | BSA/Azide free<br>AF488<br>PE/Cy7 | Abcam | ab272704<br>ab236553<br>ab102903 | 200x<br>1000x |
| Cytc<br>( <i>Lightning link</i> )                              | BSA/Azide free<br>PE/Cy7          | Abcam | ab237966<br>ab102903             | 1000x         |
| ATP5a<br>( <i>Lightning link</i> )                             | BSA/Azide free<br>AF488           | Abcam | ab231692<br>ab236553             | 200x          |
| G6PD<br>( <i>Lightning link</i> )                              | BSA/Azide free<br>APC/Cy7         | Abcam | ab231828<br>ab102859             | 1000x         |

---

\*F4/80 = 6000x for PEC

\*\*TIM4 = 200x for intestines, 1000x for liver

**Supplementary Table 2: Statistical comparisons for tissue ACC1 expression**

| Dunn's multiple comparisons test | Significant? | Summary | Adjusted P Value |
|----------------------------------|--------------|---------|------------------|
| Brain vs. Lung                   | No           | ns      | 0,0622           |
| Brain vs. cLP                    | Yes          | ****    | <0,0001          |
| Brain vs. siLP                   | No           | ns      | 0,4586           |
| Brain vs. Spleen                 | No           | ns      | 0,0608           |
| Brain vs. Liver                  | Yes          | ****    | <0,0001          |
| Brain vs. PEC                    | Yes          | ****    | <0,0001          |
| Lung vs. cLP                     | No           | ns      | 0,1459           |
| Lung vs. siLP                    | No           | ns      | >0,9999          |
| Lung vs. Spleen                  | No           | ns      | >0,9999          |
| Lung vs. Liver                   | Yes          | ****    | <0,0001          |
| Lung vs. PEC                     | Yes          | ****    | <0,0001          |
| cLP vs. siLP                     | Yes          | *       | 0,0121           |
| cLP vs. Spleen                   | No           | ns      | 0,5574           |
| cLP vs. Liver                    | No           | ns      | 0,8864           |
| cLP vs. PEC                      | Yes          | *       | 0,0121           |
| siLP vs. Spleen                  | No           | ns      | >0,9999          |
| siLP vs. Liver                   | Yes          | ****    | <0,0001          |
| siLP vs. PEC                     | Yes          | ****    | <0,0001          |
| Spleen vs. Liver                 | Yes          | ***     | 0,0010           |
| Spleen vs. PEC                   | Yes          | ****    | <0,0001          |
| Liver vs. PEC                    | No           | ns      | >0,9999          |

**Supplementary Table 3: Statistical comparisons for tissue SDHA expression**

| Dunn's multiple comparisons test | Significant? | Summary | Adjusted P Value |
|----------------------------------|--------------|---------|------------------|
| Brain vs. Lung                   | No           | ns      | >0,9999          |
| Brain vs. cLP                    | No           | ns      | >0,9999          |
| Brain vs. siLP                   | No           | ns      | >0,9999          |
| Brain vs. Spleen                 | Yes          | *       | 0,0202           |
| Brain vs. Liver                  | No           | ns      | >0,9999          |
| Brain vs. PEC                    | No           | ns      | >0,9999          |
| Lung vs. cLP                     | No           | ns      | >0,9999          |
| Lung vs. siLP                    | No           | ns      | >0,9999          |
| Lung vs. Spleen                  | Yes          | ****    | <0,0001          |
| Lung vs. Liver                   | Yes          | **      | 0,0021           |
| Lung vs. PEC                     | Yes          | **      | 0,0011           |
| cLP vs. siLP                     | No           | ns      | 0,8614           |
| cLP vs. Spleen                   | Yes          | **      | 0,0052           |
| cLP vs. Liver                    | No           | ns      | 0,7902           |
| cLP vs. PEC                      | No           | ns      | 0,5420           |
| siLP vs. Spleen                  | Yes          | ****    | <0,0001          |
| siLP vs. Liver                   | Yes          | ***     | 0,0008           |
| siLP vs. PEC                     | Yes          | ***     | 0,0004           |
| Spleen vs. Liver                 | No           | ns      | >0,9999          |
| Spleen vs. PEC                   | No           | ns      | >0,9999          |
| Liver vs. PEC                    | No           | ns      | >0,9999          |

**Supplementary Table 4: Statistical comparisons for tissue G6PD expression**

| Dunn's multiple comparisons test | Significant? | Summary | Adjusted P Value |
|----------------------------------|--------------|---------|------------------|
| Brain vs. Lung                   | Yes          | ****    | <0,0001          |
| Brain vs. cLP                    | Yes          | *       | 0,0382           |
| Brain vs. siLP                   | No           | ns      | >0,9999          |
| Brain vs. Spleen                 | Yes          | ****    | <0,0001          |
| Brain vs. Liver                  | Yes          | ****    | <0,0001          |
| Brain vs. PEC                    | Yes          | ****    | <0,0001          |
| Lung vs. cLP                     | No           | ns      | 0,7750           |
| Lung vs. siLP                    | Yes          | ***     | 0,0005           |
| Lung vs. Spleen                  | No           | ns      | >0,9999          |
| Lung vs. Liver                   | No           | ns      | >0,9999          |
| Lung vs. PEC                     | Yes          | **      | 0,0028           |
| cLP vs. siLP                     | No           | ns      | 0,6561           |
| cLP vs. Spleen                   | No           | ns      | 0,1819           |
| cLP vs. Liver                    | No           | ns      | 0,2118           |
| cLP vs. PEC                      | Yes          | ****    | <0,0001          |
| siLP vs. Spleen                  | Yes          | ****    | <0,0001          |
| siLP vs. Liver                   | Yes          | ****    | <0,0001          |
| siLP vs. PEC                     | Yes          | ****    | <0,0001          |
| Spleen vs. Liver                 | No           | ns      | >0,9999          |
| Spleen vs. PEC                   | No           | ns      | 0,1182           |
| Liver vs. PEC                    | Yes          | *       | 0,0179           |

**Supplementary Table 5: Statistical comparisons for tissue CD98 expression**

| Dunn's multiple comparisons test | Significant? | Summary | Adjusted P Value |
|----------------------------------|--------------|---------|------------------|
| Brain vs. Lung                   | No           | ns      | >0,9999          |
| Brain vs. cLP                    | No           | ns      | >0,9999          |
| Brain vs. siLP                   | No           | ns      | 0,0966           |
| Brain vs. Spleen                 | No           | ns      | 0,0897           |
| Brain vs. Liver                  | Yes          | ***     | 0,0004           |
| Brain vs. PEC                    | No           | ns      | 0,2815           |
| Lung vs. cLP                     | No           | ns      | >0,9999          |
| Lung vs. siLP                    | No           | ns      | 0,0613           |
| Lung vs. Spleen                  | Yes          | *       | 0,0286           |
| Lung vs. Liver                   | Yes          | ****    | <0,0001          |
| Lung vs. PEC                     | No           | ns      | 0,2070           |
| cLP vs. siLP                     | No           | ns      | 0,5256           |
| cLP vs. Spleen                   | Yes          | **      | 0,0022           |
| cLP vs. Liver                    | Yes          | ****    | <0,0001          |
| cLP vs. PEC                      | No           | ns      | >0,9999          |
| siLP vs. Spleen                  | Yes          | ****    | <0,0001          |
| siLP vs. Liver                   | Yes          | ****    | <0,0001          |
| siLP vs. PEC                     | No           | ns      | >0,9999          |
| Spleen vs. Liver                 | No           | ns      | >0,9999          |
| Spleen vs. PEC                   | Yes          | ****    | <0,0001          |
| Liver vs. PEC                    | Yes          | ****    | <0,0001          |

**Supplementary Table 6: Statistical comparisons for tissue CD36 expression**

| Dunn's multiple comparisons test | Significant? | Summary | Adjusted P Value |
|----------------------------------|--------------|---------|------------------|
| Brain vs. Lung                   | Yes          | **      | 0,0091           |
| Brain vs. cLP                    | No           | ns      | 0,4853           |
| Brain vs. siLP                   | No           | ns      | >0,9999          |
| Brain vs. Spleen                 | Yes          | ****    | <0,0001          |
| Brain vs. Liver                  | Yes          | ****    | <0,0001          |
| Brain vs. PEC                    | Yes          | ***     | 0,0009           |
| Lung vs. cLP                     | No           | ns      | >0,9999          |
| Lung vs. siLP                    | No           | ns      | 0,1006           |
| Lung vs. Spleen                  | No           | ns      | 0,0953           |
| Lung vs. Liver                   | No           | ns      | 0,4410           |
| Lung vs. PEC                     | No           | ns      | >0,9999          |
| cLP vs. siLP                     | No           | ns      | >0,9999          |
| cLP vs. Spleen                   | Yes          | ***     | 0,0009           |
| cLP vs. Liver                    | Yes          | **      | 0,0040           |
| cLP vs. PEC                      | No           | ns      | 0,7724           |
| siLP vs. Spleen                  | Yes          | ****    | <0,0001          |
| siLP vs. Liver                   | Yes          | ****    | <0,0001          |
| siLP vs. PEC                     | Yes          | *       | 0,0103           |
| Spleen vs. Liver                 | No           | ns      | >0,9999          |
| Spleen vs. PEC                   | No           | ns      | 0,5074           |
| Liver vs. PEC                    | No           | ns      | >0,9999          |



**Supplementary Table 7: Statistical comparisons for tissue GLUT1 expression**

| Dunn's multiple comparisons test | Significant? | Summary | Adjusted P Value |
|----------------------------------|--------------|---------|------------------|
| Brain vs. Lung                   | Yes          | **      | 0,0027           |
| Brain vs. cLP                    | Yes          | **      | 0,0033           |
| Brain vs. siLP                   | Yes          | **      | 0,0014           |
| Brain vs. Spleen                 | No           | ns      | >0,9999          |
| Brain vs. Liver                  | No           | ns      | >0,9999          |
| Brain vs. PEC                    | No           | ns      | >0,9999          |
| Lung vs. cLP                     | No           | ns      | >0,9999          |
| Lung vs. siLP                    | No           | ns      | >0,9999          |
| Lung vs. Spleen                  | Yes          | ****    | <0,0001          |
| Lung vs. Liver                   | Yes          | ****    | <0,0001          |
| Lung vs. PEC                     | Yes          | ****    | <0,0001          |
| cLP vs. siLP                     | No           | ns      | >0,9999          |
| cLP vs. Spleen                   | Yes          | ****    | <0,0001          |
| cLP vs. Liver                    | Yes          | ****    | <0,0001          |
| cLP vs. PEC                      | Yes          | ****    | <0,0001          |
| siLP vs. Spleen                  | Yes          | ****    | <0,0001          |
| siLP vs. Liver                   | Yes          | ****    | <0,0001          |
| siLP vs. PEC                     | Yes          | ****    | <0,0001          |
| Spleen vs. Liver                 | No           | ns      | >0,9999          |
| Spleen vs. PEC                   | No           | ns      | >0,9999          |
| Liver vs. PEC                    | No           | ns      | >0,9999          |

**Supplementary Table 8: Statistical comparisons for tissue PKM expression**

| Dunn's multiple comparisons test | Significant? | Summary | Adjusted P Value |
|----------------------------------|--------------|---------|------------------|
| Brain vs. Lung                   | Yes          | **      | 0,0036           |
| Brain vs. cLP                    | Yes          | **      | 0,0026           |
| Brain vs. siLP                   | No           | ns      | >0,9999          |
| Brain vs. Spleen                 | Yes          | ****    | <0,0001          |
| Brain vs. Liver                  | Yes          | ****    | <0,0001          |
| Brain vs. PEC                    | Yes          | ****    | <0,0001          |
| Lung vs. cLP                     | No           | ns      | >0,9999          |
| Lung vs. siLP                    | No           | ns      | 0,7099           |
| Lung vs. Spleen                  | Yes          | *       | 0,0408           |
| Lung vs. Liver                   | Yes          | **      | 0,0042           |
| Lung vs. PEC                     | Yes          | ***     | 0,0002           |
| cLP vs. siLP                     | No           | ns      | 0,5702           |
| cLP vs. Spleen                   | No           | ns      | 0,0532           |
| cLP vs. Liver                    | Yes          | **      | 0,0059           |
| cLP vs. PEC                      | Yes          | ***     | 0,0003           |
| siLP vs. Spleen                  | Yes          | ****    | <0,0001          |
| siLP vs. Liver                   | Yes          | ****    | <0,0001          |
| siLP vs. PEC                     | Yes          | ****    | <0,0001          |
| Spleen vs. Liver                 | No           | ns      | >0,9999          |
| Spleen vs. PEC                   | No           | ns      | >0,9999          |
| Liver vs. PEC                    | No           | ns      | >0,9999          |

**Supplementary Table 9: Statistical comparisons for tissue CPT1A expression**

| Dunn's multiple comparisons test | Significant? | Summary | Adjusted P Value |
|----------------------------------|--------------|---------|------------------|
| Brain vs. cLP                    | Yes          | ***     | 0,0002           |
| Brain vs. siLP                   | No           | ns      | 0,1012           |
| Brain vs. Spleen                 | No           | ns      | >0,9999          |
| Brain vs. Liver                  | Yes          | ****    | <0,0001          |
| Brain vs. PEC                    | Yes          | ****    | <0,0001          |
| Lung vs. cLP                     | No           | ns      | >0,9999          |
| Lung vs. siLP                    | No           | ns      | >0,9999          |
| Lung vs. Spleen                  | No           | ns      | >0,9999          |
| Lung vs. Liver                   | No           | ns      | >0,9999          |
| Lung vs. PEC                     | Yes          | ***     | 0,0004           |
| cLP vs. siLP                     | No           | ns      | >0,9999          |
| cLP vs. Spleen                   | No           | ns      | 0,1552           |
| cLP vs. Liver                    | No           | ns      | >0,9999          |
| cLP vs. PEC                      | Yes          | *       | 0,0158           |
| siLP vs. Spleen                  | No           | ns      | >0,9999          |
| siLP vs. Liver                   | No           | ns      | 0,5777           |
| siLP vs. PEC                     | Yes          | ****    | <0,0001          |
| Spleen vs. Liver                 | No           | ns      | 0,0528           |
| Spleen vs. PEC                   | Yes          | ****    | <0,0001          |
| Liver vs. PEC                    | No           | ns      | 0,0606           |

**Supplementary Table 10: Statistical comparisons for tissue Cytc expression**

| Dunn's multiple comparisons test | Significant? | Summary | Adjusted P Value |
|----------------------------------|--------------|---------|------------------|
| Brain vs. Lung                   | No           | ns      | 0,9698           |
| Brain vs. cLP                    | Yes          | **      | 0,0018           |
| Brain vs. siLP                   | No           | ns      | 0,8670           |
| Brain vs. Spleen                 | Yes          | ****    | <0,0001          |
| Brain vs. Liver                  | Yes          | ****    | <0,0001          |
| Brain vs. PEC                    | Yes          | ****    | <0,0001          |
| Lung vs. cLP                     | No           | ns      | 0,7169           |
| Lung vs. siLP                    | No           | ns      | >0,9999          |
| Lung vs. Spleen                  | Yes          | **      | 0,0059           |
| Lung vs. Liver                   | Yes          | ****    | <0,0001          |
| Lung vs. PEC                     | Yes          | ****    | <0,0001          |
| cLP vs. siLP                     | No           | ns      | 0,8133           |
| cLP vs. Spleen                   | No           | ns      | >0,9999          |
| cLP vs. Liver                    | No           | ns      | 0,0781           |
| cLP vs. PEC                      | Yes          | ****    | <0,0001          |
| siLP vs. Spleen                  | Yes          | **      | 0,0070           |
| siLP vs. Liver                   | Yes          | ****    | <0,0001          |
| siLP vs. PEC                     | Yes          | ****    | <0,0001          |
| Spleen vs. Liver                 | No           | ns      | >0,9999          |
| Spleen vs. PEC                   | No           | ns      | 0,2121           |
| Liver vs. PEC                    | No           | ns      | >0,9999          |

**Supplementary Table 11: Statistical comparisons for tissue CD38 expression**

| Dunn's multiple comparisons test | Significant? | Summary | Adjusted P Value |
|----------------------------------|--------------|---------|------------------|
| MG vs. AlvM                      | No           | ns      | >0,9999          |
| MG vs. CLP                       | No           | ns      | 0,1593           |
| MG vs. SILP                      | Yes          | *       | 0,0204           |
| MG vs. RPM                       | Yes          | ****    | <0,0001          |
| MG vs. KC                        | Yes          | ****    | <0,0001          |
| MG vs. LPM                       | No           | ns      | 0,0801           |
| AlvM vs. CLP                     | Yes          | *       | 0,0238           |
| AlvM vs. SILP                    | Yes          | **      | 0,0014           |
| AlvM vs. RPM                     | Yes          | ****    | <0,0001          |
| AlvM vs. KC                      | Yes          | ****    | <0,0001          |
| AlvM vs. LPM                     | Yes          | **      | 0,0093           |
| CLP vs. SILP                     | No           | ns      | >0,9999          |
| CLP vs. RPM                      | No           | ns      | 0,0504           |
| CLP vs. KC                       | Yes          | **      | 0,0014           |
| CLP vs. LPM                      | No           | ns      | >0,9999          |
| SILP vs. RPM                     | No           | ns      | 0,3372           |
| SILP vs. KC                      | Yes          | *       | 0,0227           |
| SILP vs. LPM                     | No           | ns      | >0,9999          |
| RPM vs. KC                       | No           | ns      | >0,9999          |
| RPM vs. LPM                      | No           | ns      | 0,1031           |
| KC vs. LPM                       | Yes          | **      | 0,0039           |

**Supplementary Table 12: Correlation coefficients for PDL1 and metabolic marker expression using simple linear regression**

|        | GLUT1 | PKM  | CD98  | G6PD | SDHA | CD36 | CPT1A | Cytc | CD38  |
|--------|-------|------|-------|------|------|------|-------|------|-------|
| Exp. 1 | 0.71  | 0.13 | 0.28  | 0.54 | 0.45 | 0.23 | 0.06  | 0.12 | 0.56  |
| Exp. 2 | 0.59  | 0.58 | 0.10  | 0.82 | 0.83 | 0.61 | 0.59  | 0.70 | 0.71  |
| Exp. 3 | 0.001 | 0.76 | 0.46  | 0.28 | 0.22 | 0.63 | 0.60  | 0.66 | 0.006 |
| Exp. 4 | 0.40  | 0.67 | 0.005 | 0.80 | 0.31 | 0.95 | N/A   | 0.77 | 0.91  |

## Supplementary Methods:

### Unmixing with SpectroFlow

#### *Reference controls*

Reference controls were stained simultaneously in parallel to the corresponding staining step for the given marker. Beads were used, as we found that this reduced the complexity resulting from AF, and improved resolution of macrophage markers. Cells were used only if beads were not suitable for the antibody isotype, or if the brightness on cells was consistently brighter than on the beads. Cells were used to generate references for all intracellular metabolic targets. Single stain references were re-used for subsequent experiments up to ~2 months, or after servicing of the cytometer.

#### *Defining AF/unstain and unmixing*

The following is a guideline for defining AF, however exact protocol is subject to each experiment/tissue:

- Create a gate to exclude debris, and second gate to exclude aggregates (single-cell gate)
- Within single cell gate, exclude UV7-high cells (P3 gate)
  - This removes large proportion of dead/non-immune cells, as seen in Supplementary Fig. 2c
- Within P3, use 2-D plot with aid of spectrogram to cycle through common peak AF channels to identify if multiple populations are present
  - Often, in our hands a combination of B3, UV7 or V7 will identify macrophages and eosinophils
  - Confirm homogeneity of population with spectrogram
- Once AF population has been identified, right click gated area and export as FCS
- Similarly for unstained, use 2-D plot of P3 but gate most AF low population
- Create a new AF channel (Library -> Fluorescent tags -> select laser group -> "Add" -> define and label AF channel) and add tag to experiment setup
  - Add corresponding reference under "edit"->"groups"
- Import exported FCS files to new AF channel and unstain reference
- "Unmix"
  - In general, macrophage AF has similar overall spectra as lymphocytes, so it is not necessary to additionally select the "Autofluorescence as tag" toggle

*In the event of multiple AF populations it is possible to check their resulting complexity:*

- Aim to gate the most negative population possible within total cells (debris gate – spectrum should be as "flat" as possible) and export as FCS
- Set the "debris" gate as the unstained and import AF populations into reference group
- "Unmix", define references and select "QC Controls" tag and "similarity matrix"
  - Click view similarity index to view the complexity between defined AF channels – anything less than 0.98 can be used as a separate tag

Note: defining multiple channels will not always improve unmixing, so a certain trial and error is required to determine optimal AF channels and unmixing.
